## How to Measure Adipose Tissue Insulin Sensitivity

Esben Søndergaard,<sup>1,2,3</sup> Ana Elena Espinosa De Ycaza,<sup>1,4</sup> Maria Morgan-Bathke,<sup>1,5</sup> and Michael D. Jensen<sup>1</sup>

<sup>1</sup>Endocrine Research Unit, Mayo Clinic, Rochester, Minnesota 55905; <sup>2</sup>Department of Endocrinology and Internal Medicine, Aarhus University Hospital, 8000 Aarhus C, Denmark; <sup>3</sup>The Danish Diabetes Academy, 5000 Odense C, Denmark; <sup>4</sup>Facultad de Medicina, Universidad de Panamá, Panama City, Republic of Panama; and <sup>5</sup>Nutrition and Dietetics, Viterbo University, La Crosse, Wisconsin 54601

**Context and Objective:** Adipose tissue insulin resistance may cause hepatic and skeletal muscle insulin resistance by releasing excess free fatty acids (FFAs). Because no consensus exists on how to quantify adipose tissue insulin sensitivity we compared three methods for measuring adipose tissue insulin sensitivity: the single step insulin clamp, the multistep pancreatic clamp, and the adipose tissue insulin resistance index (Adipo-IR).

**Design and Participants:** We studied insulin sensitivity in 25 adults by measuring the insulin concentration resulting in 50% suppression of palmitate flux (IC<sub>50</sub>) using both a multistep pancreatic clamp and a one-step hyperinsulinemic-euglycemic clamp. Palmitate kinetics were measured using a continuous infusion of [U-<sup>13</sup>C]palmitate. Adipo-IR was calculated from fasting insulin and fasting FFA concentrations.

**Results:** Adipo-IR was reproducible (sample coefficient of variability, 10.0%) and correlated with the IC<sub>50</sub> measured by the multistep pancreatic clamp technique ( $r$ , 0.86;  $P$  < 0.001). Age and physical fitness were significant predictors of the residual variation between Adipo-IR and IC<sub>50</sub>, with a positive relationship with age ( $r$ , 0.47;  $P$  = 0.02) and a negative association with VO<sub>2</sub> peak ( $r$ , -0.46;  $P$  = 0.02). Likewise, IC<sub>50</sub> measured by the multistep pancreatic clamp technique correlated with IC<sub>50</sub> measured using the one-step hyperinsulinemic-euglycemic clamp technique ( $r$ , 0.73;  $P$  < 0.001).

**Conclusion:** Adipo-IR and the one-step hyperinsulinemic-euglycemic clamp technique using a palmitate tracer are good predictors of a gold standard measure of adipose tissue insulin sensitivity. However, age and physical fitness systematically affect the predictive values. Although Adipo-IR is suitable for larger population studies, the multistep pancreatic clamp technique is probably needed for mechanistic studies of adipose tissue insulin action. (*J Clin Endocrinol Metab* 102: 1193–1199, 2017)

Insulin suppresses lipolysis efficiently in lean insulin-sensitive humans, but less so in individuals with obesity and type 2 diabetes (1). This adipose insulin resistance results in excess free fatty acid (FFA) delivery to other tissues, which may contribute to ectopic fat deposition and insulin resistance (lipotoxicity) (2). Therefore, adipose tissue insulin resistance may be an early metabolic defect in development of whole-body insulin resistance and precede insulin resistance in skeletal muscle and

liver (3). Identifying robust methods for quantification of adipose tissue insulin sensitivity could help to determine the long-term effects of isolated adipose tissue insulin resistance.

No consensus exists on how to quantify adipose tissue insulin sensitivity (4). However, the multistep pancreatic clamp approach offers the advantage of determining the full dose-response relationship of insulin's effects on lipolysis (1, 5). By using somatostatin to inhibit endogenous

insulin secretion, near zero insulin concentrations can be achieved, which provides a uniform baseline condition from which to calculate the insulin concentration required for a 50% suppression of lipolysis ( $IC_{50}$ ) (6). However, the complexity and workload involved in performing multistep pancreatic clamp studies limits the number of subjects and therefore makes large-scale studies difficult. Instead, application of more readily available and simpler approaches in larger populations would render determination of the long-term consequences of adipose tissue insulin resistance possible. One potential method is the adipose tissue insulin resistance index (Adipo-IR), which is a measure of adipose tissue insulin resistance that is equivalent to the Homeostatic Model Assessment of Insulin Resistance (HOMA-IR) index for glucose metabolism (7, 8). Adipo-IR is calculated from a single measurement of postabsorptive concentrations of FFAs and insulin (7). The Adipo-IR is associated with hepatic fat content, a marker of ectopic fat deposition (7), and improvements in nonalcoholic steatohepatitis after treatment (9). However, validation and comparison with other measures of adipose tissue insulin sensitivity is lacking.

Another approach is to measure the insulin-mediated suppression of lipolysis before and during a one-step hyperinsulinemic-euglycemic clamp (10). This does not require somatostatin infusion and takes much less time. However, because adipose tissue can be very responsive to insulin, the insulin dose used may be greater than the dose required for a maximal suppression of lipolysis. This would lead to an underestimation of adipose tissue insulin sensitivity. In addition, differences in postabsorptive insulin concentrations between subjects provide different baselines for measuring the insulin-mediated suppression of lipolysis. Until now, no studies have compared estimates of adipose tissue insulin sensitivity obtained with the multistep pancreatic clamp technique vs the one-step hyperinsulinemic-euglycemic clamp technique.

The aim of the current study was to compare different methods for quantifying adipose tissue insulin sensitivity. Our objective was to determine how well the simple and readily accessible Adipo-IR index and the one-step hyperinsulinemic-euglycemic clamp technique performed relative to the multistep pancreatic clamp technique.

## Methods

### Subjects

This study was approved by the Mayo Clinic Institutional Review Board. Participants were men and premenopausal women with or without type 2 diabetes with a body mass index (BMI) of 20 to 37 kg/m<sup>2</sup> who had been weight stable for three or more months. Participants without type 2 diabetes were not taking medications that could affect lipid metabolism. Participants with type 2 diabetes had a hemoglobin A1c of 53 to

78 mmol/mol, and oral hypoglycemic agents and statins were discontinued two weeks prior to the study. Blood glucose concentrations were controlled using subcutaneous injections of rapid acting insulin (Novorapid; Novo Nordisk, Bagsvaerd, Denmark). After signing informed consent, a history was taken and a physical examination was performed, dietary instructions were given, and a blood sample was collected for laboratory screening to exclude chronic medical conditions.

### Protocol

Each participant underwent two metabolic studies performed two to three weeks apart. For three days prior to each study day, patients consumed an isocaloric diet (45% carbohydrates, 20% protein, and 35% fat) provided by the Mayo Clinic Research and Trials Unit (CRTU) to ensure consistency of energy intake and nutrient composition. Participants were instructed to taper off caffeine-containing beverages (tea, coffee, and soda) to reduce the likelihood of a caffeine withdrawal headache during the study. The evening prior to the studies, the volunteers were admitted to the CRTU. Volunteers with type 2 diabetes were started on a variable overnight intravenous infusion of insulin to maintain blood glucose concentrations < 8.3 mmol/L. The insulin infusion was discontinued two hours before the start of the study to allow for the complete clearance of the exogenous insulin.

During the first metabolic study (day 1), insulin regulations of lipolysis was measured during a multistep pancreatic clamp procedure with a somatostatin infusion to suppress endogenous insulin secretion. In the morning, volunteers had an intravenous catheter placed in a retrograde fashion in a hand vein for blood sampling and an intravenous catheter placed in a contralateral forearm vein for infusions. A baseline blood sample was collected to measure background palmitate enrichment and to measure FFA and insulin concentrations for calculation of Adipo-IR. At ~0800 hours (0 minutes), an infusion of somatostatin (60 ng·kg<sup>-1</sup>·min<sup>-1</sup>) and replacement doses of glucagon (0.30 ng·kg<sup>-1</sup>·min<sup>-1</sup>) and growth hormone (0.25 ng·kg<sup>-1</sup>·min<sup>-1</sup>) were initiated and maintained for the duration of study day 1. Insulin regulation of lipolysis was assessed using three sequential, two-hour infusion insulin doses of 0, 0.25, and 1.0 mU·kg<sup>-1</sup>·min<sup>-1</sup>; the 0.25 and 1.0 mU·kg<sup>-1</sup>·min<sup>-1</sup> doses were given as primed, constant infusions. [<sup>13</sup>C]palmitate (300 nmol/min) was infused beginning one hour before the clamp and during the last hour of each insulin dose to allow measurement of FFA kinetics over the last 30 minutes of each dose. This approach provides three dose-response points and sufficient information to define the insulin concentration for a 50% suppression of lipolysis ( $IC_{50}$ ) even in very insulin-sensitive subjects (6, 10). A 50% dextrose infusion was given as needed to prevent blood glucose from decreasing to below ~5.0 mmol/L, with measurement of blood glucose every 10 minutes. Arterialized venous blood samples were collected using the “hot box” approach with a temperature of 131°F, to allow measurement of hormone, tracer, and substrate concentrations during the last 30 minutes of each 120-minute insulin dose interval. At ~1400 hours (after 360 minutes), infusions were stopped and the participants were provided with lunch.

In the second metabolic study (day 2), insulin-mediated suppression of lipolysis was measured during a one-step hyperinsulinemic-euglycemic clamp with intravenous catheters, blood sampling, and [<sup>13</sup>C]palmitate infusions as on day 1. The participants received a primed, constant infusion

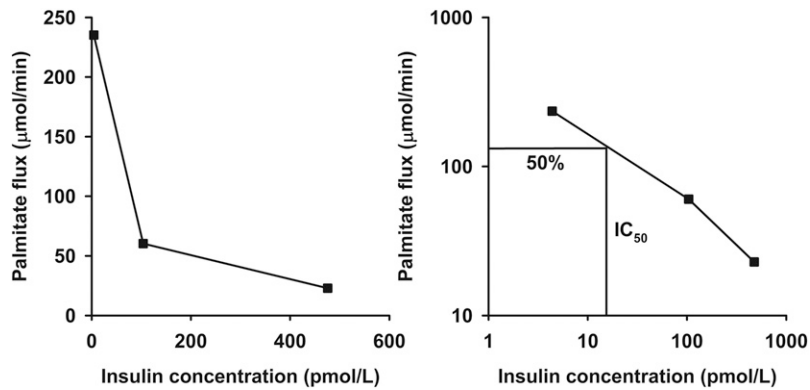

**Figure 1.** The dose-response relationship between insulin concentration and palmitate flux (left) for a single representative insulin-sensitive subject. The insulin concentration required for a 50% suppression of palmitate flux ( $IC_{50}$ ) is used as an estimate of adipose tissue insulin sensitivity. This is calculated after linearization of the relationship by logarithmic transformation (right).

of insulin ( $1 \text{ mU} \cdot \text{kg}^{-1} \cdot \text{min}^{-1}$ ) that was continued for 2 hours, together with 50% dextrose to maintain euglycemia ( $\sim 5.0 \text{ mmol/L}$ ). After the infusions were stopped, the participants consumed lunch and were dismissed from the CRTU.

### Body composition

Participants underwent dual energy x-ray absorptiometry and a computed tomography scan of  $L_{2-3}$  interspace to measure fat-free mass, total body fat, and regional fat masses, as previously described (11).

### Physical fitness

An exercise bike test was performed to determine peak oxygen consumption ( $VO_{2\text{peak}}$ ). This was expressed per kilogram of fat-free mass (12).

### Plasma fatty acid concentrations and enrichment

Individual FFA concentrations of palmitic, oleic, linoleic, linolenic, eicosapentaenoic, docosahexaenoic, palmitoleic, palmiteladic, arachidonic, myristic, elaidic, and stearic acid (added to calculate total FFA) and plasma  $[U-^{13}\text{C}]$ palmitate enrichment were measured using liquid chromatography/mass spectrometry (13).

### Calculations

Steady-state palmitate flux ( $\mu\text{mol/min}$ ) was calculated by dividing the  $[U-^{13}\text{C}]$ palmitate infusion rate ( $\mu\text{mol/min}$ ) by steady-state plasma enrichment (%), as previously described (13). To linearize the relationship between plasma insulin concentrations and palmitate flux, we log transformed both variables, which allowed us to calculate the  $IC_{50}$  (pmol/L) for suppression of lipolysis for each study day (Fig. 1) (10). Adipo-IR ( $\text{mmol} \times \text{pmol/L}$ ) was calculated for each study day by multiplying the fasting FFA concentration (mmol/L) by the fasting insulin concentration (pmol/L). HOMA-IR was calculated as previously reported (8).

### Statistics

Data were analyzed using SPSS 21.0 (IBM) and expressed as mean (95% confidence interval) or median [interquartile range (IQR)]. When possible, nonnormally distributed data were

logarithmically transformed to ensure normal distribution. Adipo-IR was logarithmically transformed to obtain normally distributed data for calculation of coefficient of variation (CV). For linear regression analyses, residuals were normally distributed and plotted against predicted values to check assumptions. Bland-Altman plots of the z-scores of the estimates were evaluated for Adipo-IR and  $IC_{50}$  to ensure a similar spread across the range of measurements.

## Results

### Subject characteristics

Twenty-five subjects were included in the study (14 men, 11 women) (Table 1).

Subjects with wide ranges in age, adiposity, and physical fitness were included to gain a representative sample. Two participants had type 2 diabetes. All comparisons between the different methods were performed with estimates on separate days to avoid potential dependency between measurements of fasting FFA concentration for Adipo-IR and subsequent measures of insulin-mediated suppression of lipolysis ( $IC_{50}$ ). On day 1, palmitate flux rates were 204 (IQR, 177 to 234), 36 (IQR, 28 to 47), and 19 (IQR, 17 to 23)  $\mu\text{mol/min}$  for zero, low, and high insulin concentrations, respectively. On day 2, palmitate flux rates were 106 (IQR, 95 to 119)

**Table 1. Subject Characteristics**

| Characteristic                           | Variable <sup>a</sup> |
|------------------------------------------|-----------------------|
| No. of subjects                          | 25                    |
| Sex (male/female)                        | 14/11                 |
| Age, y                                   | 43 (22–55)            |
| BMI, $\text{kg/m}^2$                     | 30.9 (21.2–38.2)      |
| FFM, kg                                  | 58.3 (52.7, 63.9)     |
| Fat percentage, %                        | 35.1 (31.6, 38.7)     |
| Visceral fat, kg                         | 4.3 (3.1, 5.6)        |
| Upper body subcutaneous fat, kg          | 16.5 (13.5, 19.6)     |
| Lower body fat, kg                       | 10.6 (9.1, 12.0)      |
| $VO_{2\text{peak}}$ , mL/kg FFM/min      | 43.5 (40.7, 46.3)     |
| REE, kcal/24 h                           | 1690 (1518, 1861)     |
| Triglycerides, mmol/L                    | 1.0 (0.8, 1.2)        |
| Total cholesterol, mmol/L                | 4.6 (4.4, 4.7)        |
| LDL cholesterol, mmol/L                  | 2.6 (2.3, 2.8)        |
| HDL cholesterol, mmol/L                  | 1.5 (1.3, 1.7)        |
| Glucose, mmol/L                          | 4.9 (3.5–13.1)        |
| Insulin, pmol/L                          | 37.9 (30.3, 45.6)     |
| HOMA-IR                                  | 1.1 (0.8, 1.4)        |
| FFA, mmol/L                              | 0.45 (0.40, 0.52)     |
| $IC_{50}$ (day 1), pmol/L                | 7.9 (5.9, 10.7)       |
| $IC_{50}$ (day 2), pmol/L                | 113 (90, 142)         |
| Adipo-IR (day 1), pmol/L $\times$ mmol/L | 15.3 (11.9, 19.6)     |
| Adipo-IR (day 2), pmol/L $\times$ mmol/L | 16.9 (12.8, 22.2)     |

Abbreviation: FFM, fat-free mass.

<sup>a</sup>Data are expressed as mean (95% confidence interval) for normally distributed variables or median (range) for variables that were not normally distributed.

and 27 (IQR, 22 to 31)  $\mu\text{mol}/\text{min}$  for basal and high insulin concentrations. The  $\text{IC}_{50}$  calculated from the data obtained on day 2 was much greater than the  $\text{IC}_{50}$  calculated from the data obtained on day 1 because fasting insulin concentrations often suppress palmitate flux to less than 50% of what is observed under insulin withdrawal (somatostatin) conditions. Adipo-IR was reproducible with a sample CV of 10.0%.

### Multistep pancreatic clamp technique [ $\text{IC}_{50}$ (day 1)] vs Adipo-IR (day 2)

The  $\text{IC}_{50}$  measured by the multistep pancreatic clamp technique was well correlated with the Adipo-IR calculated from data obtained on day 2 ( $r, 0.86; P < 0.001$ ) (Fig. 2). To test for factors that might account for systematic variations between Adipo-IR and  $\text{IC}_{50}$  from day 1, we examined the correlation between the residuals from the relationship between day 2 Adipo-IR and day 1  $\text{IC}_{50}$  and the potential confounding variables of sex, age, BMI,  $\text{VO}_2\text{peak}$ , resting energy expenditure (REE), fat percent, and regional fat masses (visceral, upper body subcutaneous, and lower body fat). We found a positive relationship between age ( $r, 0.47; P = 0.02$ ) and the residuals and a negative association between  $\text{VO}_2\text{peak}$  ( $r, -0.46; P = 0.02$ ) and the residuals. This indicates that Adipo-IR overestimates adipose tissue insulin sensitivity with older age [Fig. 3(a)] and underestimates adipose tissue insulin sensitivity in those with better physical fitness [Fig. 3(b)]. There was no difference between sexes and no association with BMI, REE, fat percent, or regional fat masses. If age and  $\text{VO}_2\text{peak}$  were included in a multiple linear regression model along with Adipo-IR, the ability to predict  $\text{IC}_{50}$  was improved compared with Adipo-IR by itself ( $R^2, 0.83$  vs  $R^2, 0.75$ ).

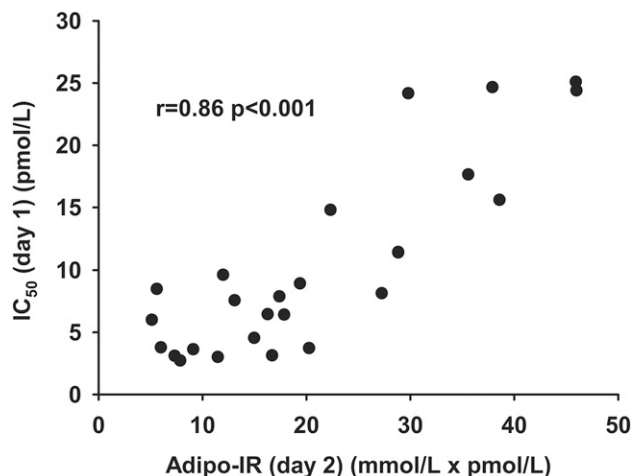

**Figure 2.** The relationship between Adipo-IR (day 2) ( $\text{mmol}/\text{L} \times \text{pmol}/\text{L}$ ) and  $\text{IC}_{50}$  (day 1) ( $\text{pmol}/\text{L}$ ) as measured by the multistep clamp technique.

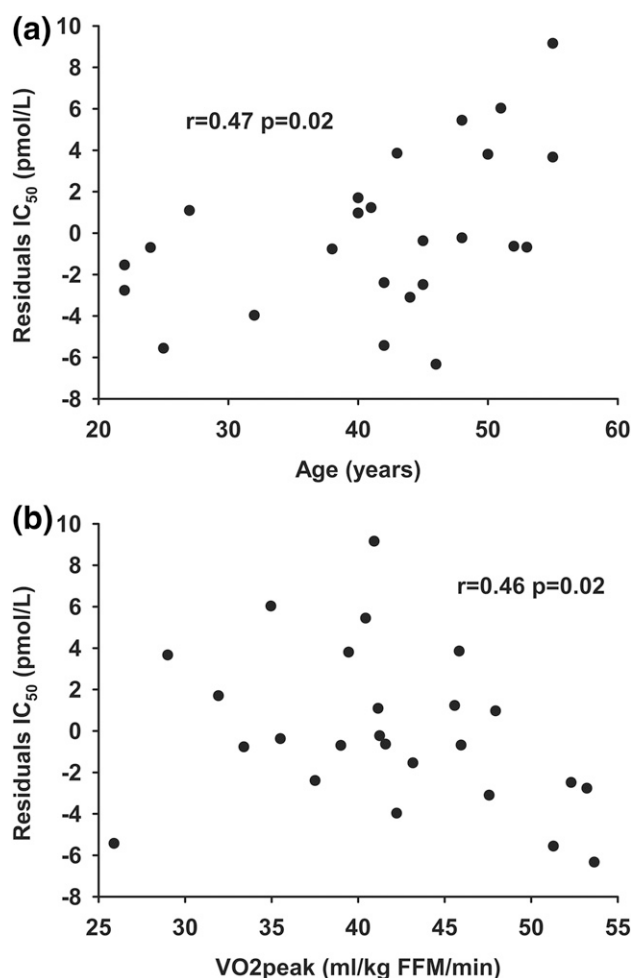

**Figure 3.** The relationship between (a) age and (b)  $\text{VO}_2\text{peak}$  and the residuals from the relationship between Adipo-IR (day 2) ( $\text{pmol}/\text{L} \times \text{mmol}/\text{L}$ ) and  $\text{IC}_{50}$  (day 1) ( $\text{pmol}/\text{L}$ ).

### One-step hyperinsulinemic-euglycemic clamp technique [ $\text{IC}_{50}$ (day 2)] vs Adipo-IR (day 1)

The  $\text{IC}_{50}$  measured using the one-step hyperinsulinemic-euglycemic clamp on day 2 was correlated with Adipo-IR calculated from data obtained on day 1 ( $r, 0.71; P < 0.001$ ) (Fig. 4). There was no association between the residuals from the relationship and sex, age, BMI,  $\text{VO}_2\text{peak}$ , REE, fat percent, and regional fat mass.

### Multistep pancreatic vs one-step hyperinsulinemic-euglycemic clamp

The  $\text{IC}_{50}$  calculated from the multistep pancreatic clamp performed on day 1 was correlated with the  $\text{IC}_{50}$  calculated from the one-step insulin clamp performed on day 2 ( $r, 0.73; P < 0.001$ ; Fig. 5). A trend was observed between the residual variances between  $\text{IC}_{50}$  from day 2 and  $\text{IC}_{50}$  from day 1 and age ( $r, 0.33; P = 0.10$ ). The variables of sex,  $\text{VO}_2\text{peak}$ , BMI, REE, fat percent, and regional fat mass were not correlated with the residual differences between the two  $\text{IC}_{50}$  values. If age and  $\text{IC}_{50}$  from day 2 were included in a multiple linear regression

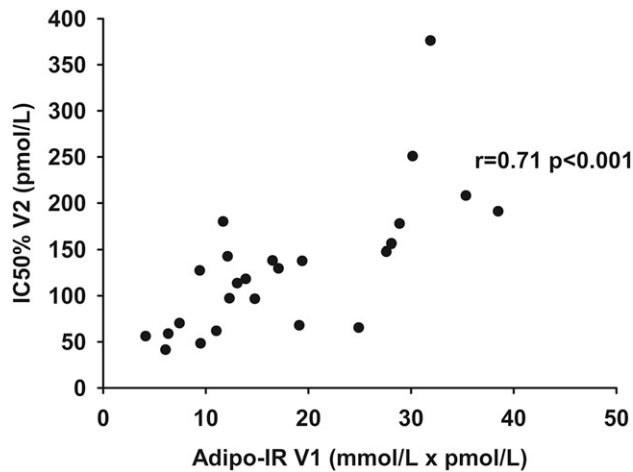

**Figure 4.** The relationship between Adipo-IR (day 1) (pmol/L  $\times$  mmol/L) and  $IC_{50}$  (day 2) (pmol/L) as measured by the one-step clamp technique.

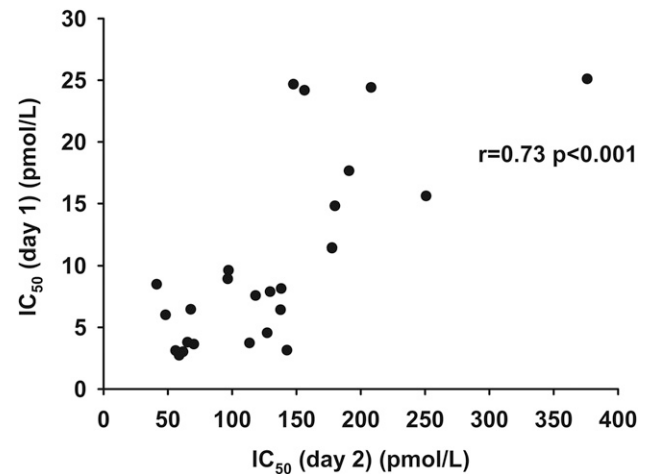

**Figure 5.** The relationship between  $IC_{50}$  (day 2) (pmol/L) as measured by the one-step clamp technique and  $IC_{50}$  (day 1) (pmol/L) as measured by the multistep clamp technique.

model, the ability to predict the day 1  $IC_{50}$  was modestly better than using the day 2  $IC_{50}$  alone ( $R^2$ , 0.61 vs  $R^2$ , 0.54).

## Discussion

In the current study, we compared measures of adipose tissue insulin sensitivity using the multistep pancreatic clamp technique, the single-step insulin clamp technique, and Adipo-IR. Because adipose tissue insulin resistance may cause hepatic and skeletal muscle insulin resistance by excess delivery of FFAs (2, 3), reliable assessment of adipose tissue insulin sensitivity is needed. We found that the Adipo-IR index provided a reproducible and comparable measure of adipose tissue insulin resistance, but that age and physical fitness affect the estimates. In addition, we found a good relationship between adipose tissue insulin sensitivity measured by a one-step hyperinsulinemic-euglycemic and a multistep pancreatic clamp technique.

Insulin inhibits lipolysis quite efficiently, and there is a close, inverse relationship between insulin concentration and palmitate flux for each individual. In obesity and type 2 diabetes, this relationship is shifted upward, with higher rates of lipolysis at any given insulin concentration (5). Therefore, multiplying the fasting insulin concentration by the fasting FFA concentration provides a measure of adipose tissue insulin sensitivity (Adipo-IR) (14). This is related to the HOMA-IR for glucose metabolism (8). However, for glucose, a tightly regulated feedback loop exists wherein glucose is generally maintained within a narrow range (1), whereas no such feedback loop is strongly operative for FFA. Although insulin efficiently suppresses lipolysis (1), circulating FFA can act to amplify glucose-stimulated insulin secretion (15, 16). One might conclude that Adipo-IR is a less robust measure

of insulin sensitivity than the HOMA-IR; however, Adipo-IR is elevated in subjects with impaired fasting glucose and impaired glucose tolerance (17) and is associated with an impaired suppression of lipolysis (18). In addition, Adipo-IR is associated with hepatic fat content and with the improvement in histological parameters following treatment of nonalcoholic steatohepatitis (7, 14). Because it was not entirely clear whether Adipo-IR reflects a physiological defect in adipose tissue or is merely a surrogate marker, we compared Adipo-IR to direct measures of adipose tissue insulin action. There was a good correlation between Adipo-IR and insulin sensitivity as determined by a multistep pancreatic clamp technique; however, the association was less robust in insulin-sensitive subjects and, therefore, may limit the use in this population. In addition, Adipo-IR was reproducible with a CV of only 10%. However, this CV may not apply to studies in larger populations without a controlled diet. In the current study, subjects consumed a three-day isoenergetic diet provided by our metabolic kitchen, which reduces variation in FFA concentration and kinetics by  $\sim 50\%$  (6, 19). Whether insulin concentration varies concordantly with FFA concentration, thereby minimizing the impact on Adipo-IR estimates, remains unknown. We suggest that Adipo-IR is a reasonable measure of adipose tissue insulin sensitivity for use in larger populations. It does not appear to be able to substitute for the clamp technique in mechanistic studies of adipose insulin action, especially over more narrow ranges of insulin sensitivity.

In the current study, we found that age and  $VO_{2peak}$  accounted for some of the variability in the relationship between Adipo-IR and  $IC_{50}$  from the multistep clamp. A similar trend was observed for age in the relationship between  $IC_{50}$  from the one-step and the multistep clamp. This leads us to suggest that age and/or physical fitness

differences between subjects may systematically alter the adipose tissue insulin sensitivity estimates when using these methods. The most likely explanation is the less standardized conditions for measuring Adipo-IR and the single-step clamp  $IC_{50}$ , with potential differences in other hormones that affect lipolysis. The differences in estimates of adipose tissue insulin sensitivity could arise from differences in growth hormone (GH) (20) or catecholamines. GH secretion and catecholamine sensitivity decrease with age (21, 22), which could explain lower fasting FFA concentrations for any given insulin concentration in older subjects. Similarly, exercise and physical fitness increase GH secretion and catecholamine responsiveness and therefore explain greater fasting FFA concentration at a certain insulin level in subjects with better physical fitness (23, 24). The impact of GH on lipolysis argues in favor of using the pancreatic clamp technique, in which somatostatins inhibit GH secretion, thereby circumventing the effects of differences in GH secretion and GH-mediated lipolytic action. In addition, somatostatins could also have inhibitory effects on epinephrine secretion (25). In contrast with GH and catecholamines, glucagon is unlikely to explain the effects of age and physical fitness, because glucagon has little effect on lipolysis at physiological concentrations (26).

We also found a good correlation between  $IC_{50}$  estimated by the multistep pancreatic and the one-step hyperinsulinemic-euglycemic clamp technique. Therefore, the one-step hyperinsulinemic-euglycemic clamp is a reasonable alternative to the multistep pancreatic clamp. The one-step hyperinsulinemic-euglycemic clamp is more widely available and reduced the duration of the study. In addition, in studies applying the one-step hyperinsulinemic-euglycemic clamp for other primary outcomes, estimates of adipose tissue insulin sensitivity can be obtained as a secondary outcome. However, the insulin dose applied for the clamp is crucial. The dose-response relationship between insulin concentration and lipolysis is very steep in insulin-sensitive individuals; therefore, the dose applied may be greater than necessary for a maximal suppression of lipolysis outside the linear part of the log-log curve. This would lead to an underestimation of adipose tissue insulin sensitivity, which may also have been the case for some of the subjects in the current study, thereby explaining the less than ideal agreement between  $IC_{50}$  as measured by the multistep and the one-step clamp. This could potentially be overcome by selecting an insulin dose of approximately one-half of that used for our day 2 study. However, this cannot be determined from our current data, because the dose-response relationship is determined from only two data points (basal and clamp), whereas the multistep

clamp with three data points would reveal a lack of linearity. We acknowledge that when studying a population with large variations in adipose tissue insulin sensitivity, it may be difficult to obtain useful data for all subjects with only a single insulin dose.

There are limitations to our study. First, although our study covered wide ranges in age, adiposity, physical fitness, and adipose tissue insulin sensitivity, we included only two subjects with type 2 diabetes. This limits our ability to extend our findings to patients with this disease. Second, our subjects consumed a controlled three-day diet before each study day, and our data may not apply to studies that do not include a carefully controlled diet. Third, we studied 27 subjects, but somatostatin failed to suppress insulin secretion sufficiently ( $<1$  pmol/L) to calculate a valid  $IC_{50}$  in two subjects. If our subjects represent a typical population, then  $\sim 5\%$  to  $10\%$  of the time, the multistep pancreatic clamp will fail to provide the expected data.

In conclusion, Adipo-IR estimates adipose tissue insulin sensitivity reasonably well compared with a multistep pancreatic clamp with FFA tracers. This supports the use of Adipo-IR for larger population studies. However, Adipo-IR cannot substitute the direct measurements of insulin action in adipose tissue obtained by the clamp techniques, and this direct measurement is preferred for mechanistic studies of insulin action in adipose tissue. In addition, if our findings can be reproduced, we suggest that age and physical fitness might be needed as part of more robust models of adipose tissue insulin sensitivity when using Adipo-IR. Finally, the one-step hyperinsulinemic-euglycemic clamp technique is a reasonable and more convenient alternative to the multistep pancreatic clamp technique in studies with other primary outcomes.

## Acknowledgments

We are grateful for the excellent assistance provided by Barbara Norby and Pamela Reich with respect to subject recruitment and performance of the studies. We acknowledge the excellent technical assistance provided by Christy Allred, Debra Harteneck, and Lendia Zhou.

Address all correspondence and requests for reprints to: Michael D. Jensen, MD, Mayo Clinic, Endocrine Research Unit, 200 1st Street SW, Room 5-194 Joseph, Rochester, Minnesota 55905. E-mail: [jensen@mayo.edu](mailto:jensen@mayo.edu).

This work was supported by National Center for Research Resources Grant 1UL1RR024150; National Institutes of Health Grants DK45343, DK40484, DK50456; and grants from The Danish Diabetes Academy supported by the Novo Nordisk Foundation, Danish Diabetes Association, Augustinus Foundation, and the Research Council Aarhus University Hospital.

Author contributions: E.S. performed the studies, analyzed the data, and wrote the manuscript. A.E.E.D.Y. and M.M.-B. performed the studies, contributed to the discussion, and reviewed and edited the manuscript. M.D.J. designed and oversaw the study, and reviewed and edited the manuscript.

Disclosure Summary: The authors have nothing to disclose.

## References

1. Groop LC, Bonadonna RC, DelPrato S, Ratheiser K, Zyck K, Ferrannini E, DeFronzo RA. Glucose and free fatty acid metabolism in non-insulin-dependent diabetes mellitus. Evidence for multiple sites of insulin resistance. *J Clin Invest*. 1989;84(1):205–213.
2. Ferrannini E, Barrett EJ, Bevilacqua S, DeFronzo RA. Effect of fatty acids on glucose production and utilization in man. *J Clin Invest*. 1983;72(5):1737–1747.
3. Shulman GI. Ectopic fat in insulin resistance, dyslipidemia, and cardiometabolic disease. *N Engl J Med*. 2014;371(12):1131–1141.
4. Søndergaard E, Jensen MD. Quantification of adipose tissue insulin sensitivity. *J Invest Med*. 2016;64(5):989–991.
5. Groop LC, Saloranta C, Shank M, Bonadonna RC, Ferrannini E, DeFronzo RA. The role of free fatty acid metabolism in the pathogenesis of insulin resistance in obesity and noninsulin-dependent diabetes mellitus. *J Clin Endocrinol Metab*. 1991;72(1):96–107.
6. Jensen MD, Caruso M, Heiling V, Miles JM. Insulin regulation of lipolysis in nondiabetic and IDDM subjects. *Diabetes*. 1989;38(12):1595–1601.
7. Gastaldelli A, Harrison SA, Belfort-Aguilar R, Hardies LJ, Balas B, Schenker S, Cusi K. Importance of changes in adipose tissue insulin resistance to histological response during thiazolidinedione treatment of patients with nonalcoholic steatohepatitis. *Hepatology*. 2009;50(4):1087–1093.
8. Matthews DR, Hosker JP, Rudenski AS, Naylor BA, Treacher DF, Turner RC. Homeostasis model assessment: insulin resistance and beta-cell function from fasting plasma glucose and insulin concentrations in man. *Diabetologia*. 1985;28(7):412–419.
9. Bell LN, Wang J, Muralidharan S, Chalasani S, Fullenkamp AM, Wilson LA, Sanyal AJ, Kowdley KV, Neuschwander-Tetri BA, Brunt EM, McCullough AJ, Bass NM, Diehl AM, Unalp-Arida A, Chalasani N; Nonalcoholic Steatohepatitis Clinical Research Network. Relationship between adipose tissue insulin resistance and liver histology in nonalcoholic steatohepatitis: a pioglitazone versus vitamin E versus placebo for the treatment of nondiabetic patients with nonalcoholic steatohepatitis trial follow-up study. *Hepatology*. 2012;56(4):1311–1318.
10. Jensen MD, Nielsen S. Insulin dose response analysis of free fatty acid kinetics. *Metabolism*. 2007;56(1):68–76.
11. Jensen MD, Kanaley JA, Reed JE, Sheedy PF. Measurement of abdominal and visceral fat with computed tomography and dual-energy x-ray absorptiometry. *Am J Clin Nutr*. 1995;61(2):274–278.
12. Harrison MH, Brown GA, Cochrane LA. Maximal oxygen uptake: its measurement, application, and limitations. *Aviat Space Environ Med*. 1980;51(10):1123–1127.
13. Persson XM, Blachnio-Zabielska AU, Jensen MD. Rapid measurement of plasma free fatty acid concentration and isotopic enrichment using LC/MS. *J Lipid Res*. 2010;51(9):2761–2765.
14. Gastaldelli A, Cusi K, Pettiti M, Hardies J, Miyazaki Y, Berria R, Buzzigoli E, Sironi AM, Cersosimo E, Ferrannini E, DeFronzo RA. Relationship between hepatic/visceral fat and hepatic insulin resistance in nondiabetic and type 2 diabetic subjects. *Gastroenterology*. 2007;133(2):496–506.
15. Itoh Y, Kawamata Y, Harada M, Kobayashi M, Fujii R, Fukusumi S, Ogi K, Hosoya M, Tanaka Y, Uejima H, Tanaka H, Maruyama M, Satoh R, Okubo S, Kizawa H, Komatsu H, Matsumura F, Noguchi Y, Shinohara T, Hinuma S, Fujisawa Y, Fujino M. Free fatty acids regulate insulin secretion from pancreatic beta cells through GPR40. *Nature*. 2003;422(6928):173–176.
16. Dobbins RL, Chester MW, Stevenson BE, Daniels MB, Stein DT, McGarry JD. A fatty acid-dependent step is critically important for both glucose- and non-glucose-stimulated insulin secretion. *J Clin Invest*. 1998;101(11):2370–2376.
17. Abdul-Ghani MA, Molina-Carrion M, Jani R, Jenkinson C, DeFronzo RA. Adipocytes in subjects with impaired fasting glucose and impaired glucose tolerance are resistant to the anti-lipolytic effect of insulin. *Acta Diabetol*. 2008;45(3):147–150.
18. Hershkop K, Besor O, Santoro N, Pierpont B, Caprio S, Weiss R. Adipose insulin resistance in obese adolescents across the spectrum of glucose tolerance. *J Clin Endocrinol Metab* 2016;101(6):2423–2431.
19. Nielsen S, Guo Z, Albu JB, Klein S, O'Brien PC, Jensen MD. Energy expenditure, sex, and endogenous fuel availability in humans. *J Clin Invest*. 2003;111(7):981–988.
20. Raben MS. Growth hormone. 1. Physiologic aspects. *N Engl J Med*. 1962;266:31–35.
21. Finkelstein JW, Roffwarg HP, Boyar RM, Kream J, Hellman L. Age-related change in the twenty-four-hour spontaneous secretion of growth hormone. *J Clin Endocrinol Metab*. 1972;35(5):665–670.
22. Lönnqvist F, Nyberg B, Wahrenberg H, Arner P. Catecholamine-induced lipolysis in adipose tissue of the elderly. *J Clin Invest*. 1990;85(5):1614–1621.
23. De Glisezinski I, Crampes F, Harant I, Berlan M, Hejnova J, Langin D, Rivière D, Stich V. Endurance training changes in lipolytic responsiveness of obese adipose tissue. *Am J Physiol*. 1998;275(6 Pt 1):E951–E956.
24. Godfrey RJ, Madgwick Z, Whyte GP. The exercise-induced growth hormone response in athletes. *Sports Med*. 2003;33(8):599–613.
25. Koppo K, Larrouy D, Marques MA, Berlan M, Bajzova M, Polak J, Van de Voorde J, Bülow J, Lafontan M, Crampes F, Langin D, Stich V, de Glisezinski I. Lipid mobilization in subcutaneous adipose tissue during exercise in lean and obese humans. Roles of insulin and natriuretic peptides. *Am J Physiol Endocrinol Metab*. 2010;299(2):E258–E265.
26. Miles JM, Jensen MD. Does glucagon regulate adipose tissue lipolysis? *J Clin Endocrinol Metab* 1993;77(1):5A–5B.
